# Supplementary material for: Atmospheric column-averaged mole fractions of carbon dioxide at 53 aircraft measurement sites
Source: Copernicus journal article supplement (doi:10.5194/acp-13-5265-2013), 2013-05-27
Supplement: Supplementary file 1 [file acp-13-5265-2013-supplement.pdf]

## Supplementary materials for “Atmospheric column-averaged mole fractions of carbon dioxide at 53 aircraft measurement sites”.

Y. Miyamoto, M. Inoue, I. Morino, O. Uchino, T. Yokota, T. Machida, Y. Sawa, H. Matsueda, C. Sweeney, P. P. Tans, A. E. Andrews, and P. K. Patra

In Sect. 4 (Results and Discussion), we show the calculated  $XCO_2$  values and their uncertainties at typical 7 sites in Fig. 4. Here, results for all the 53 sites are shown in Fig. S1 (CONTRAIL sites), S2 (NOAA sites) and S3 (NIES sites). For convenience, results for the 7 sites remain in the figures.

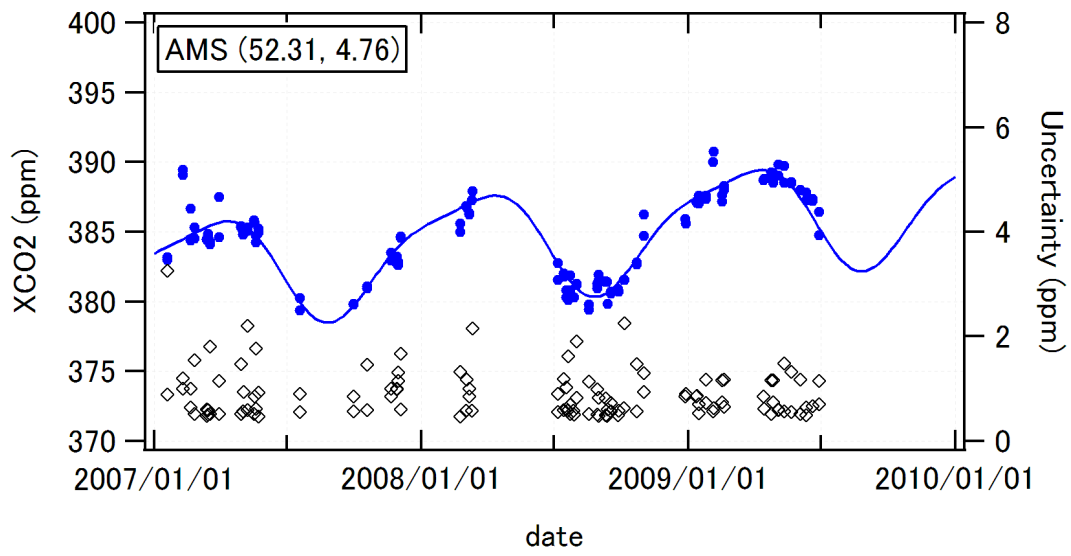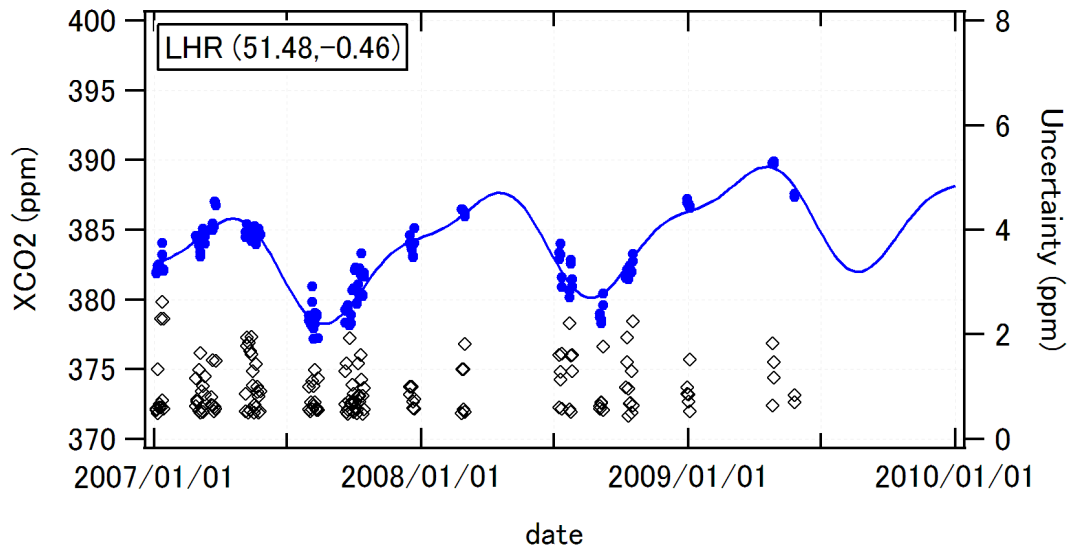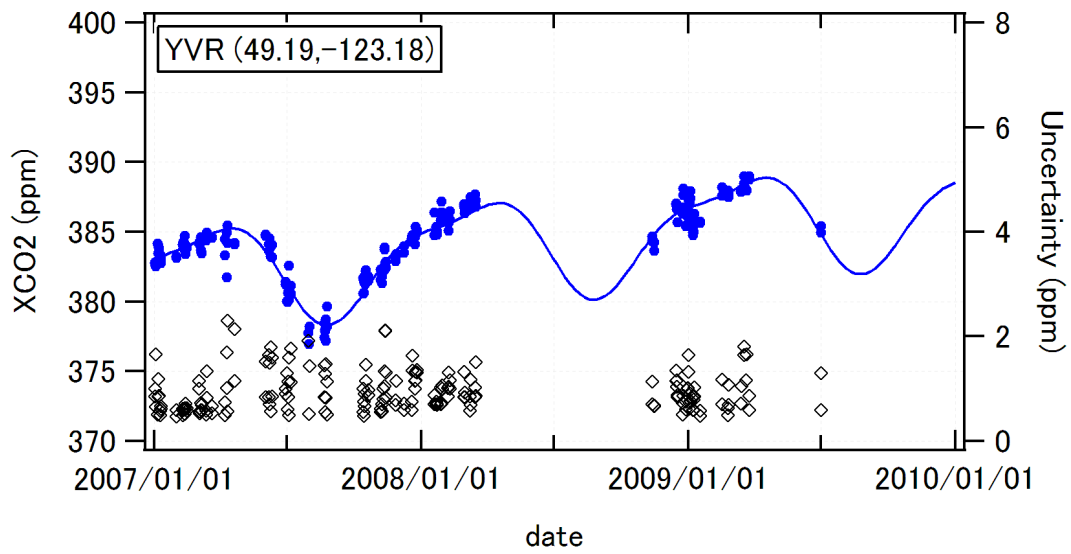

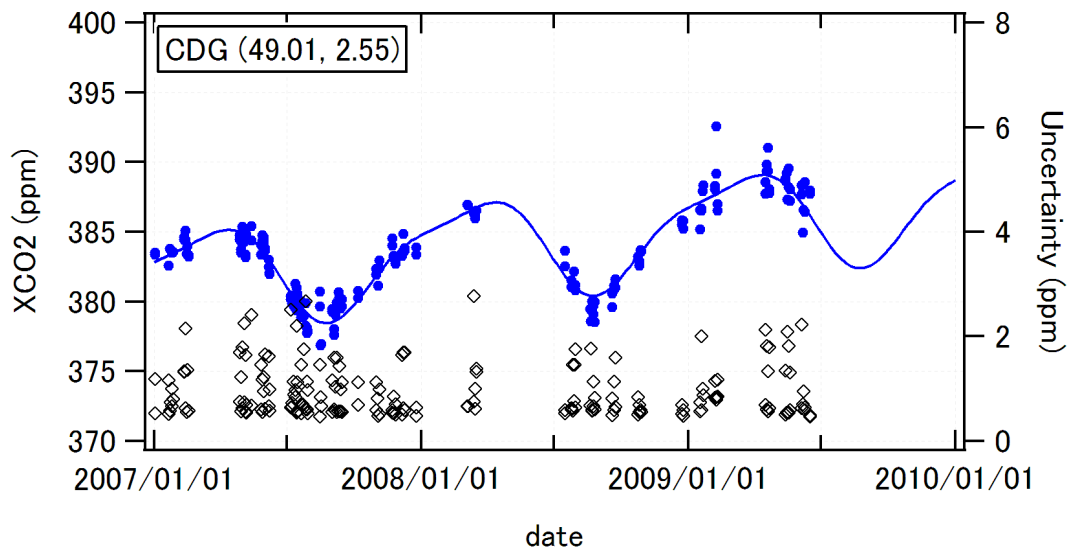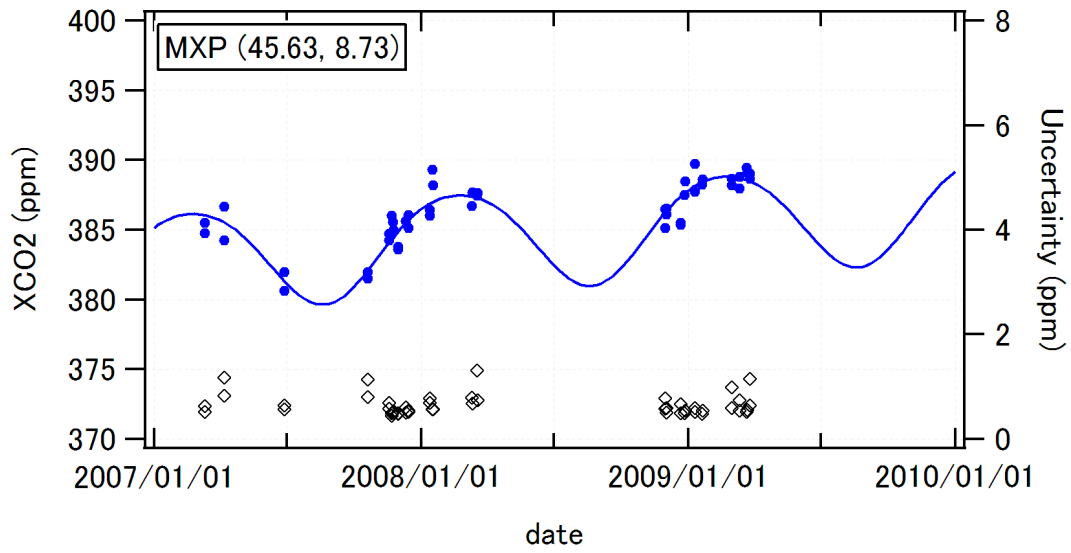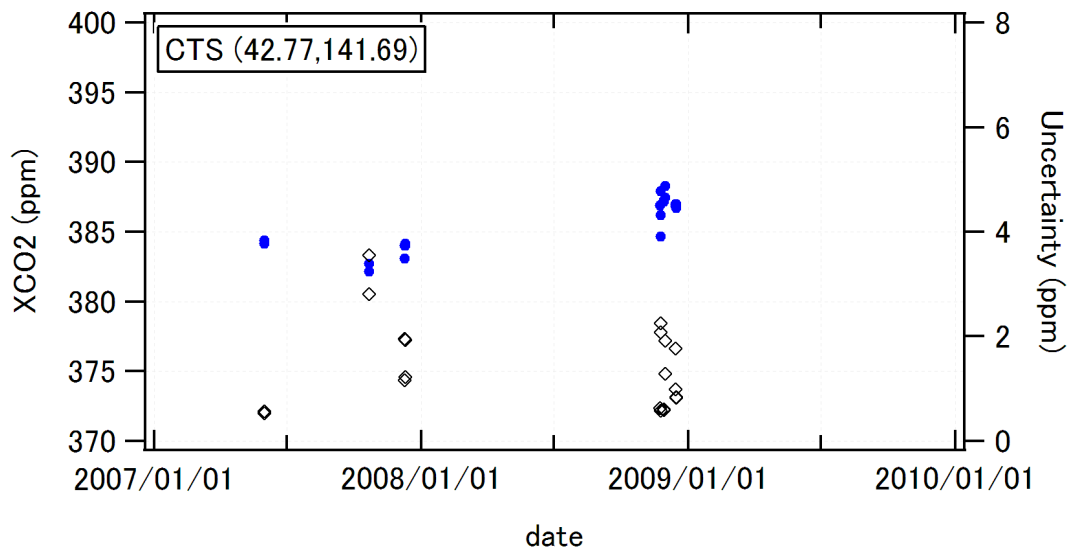

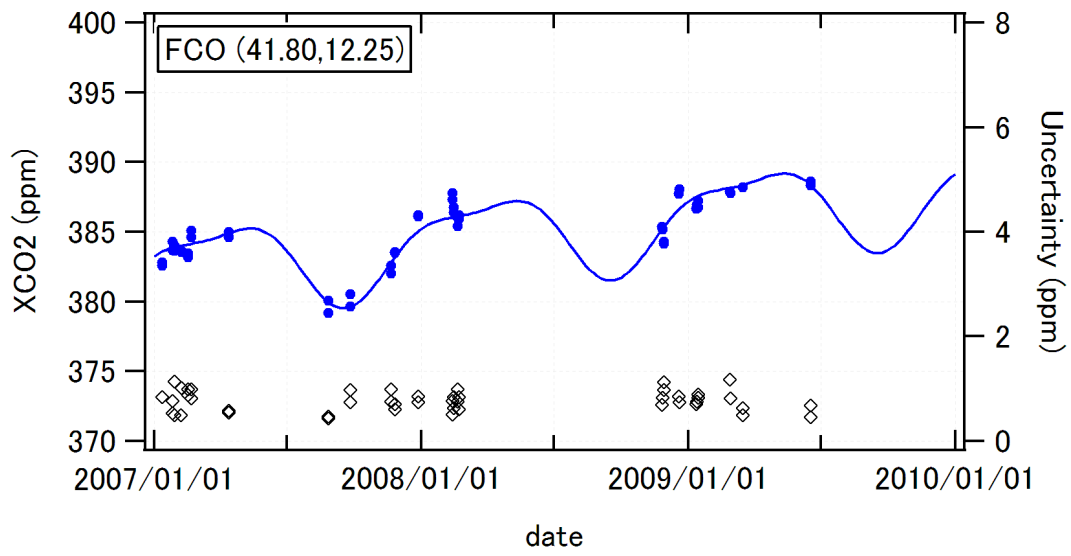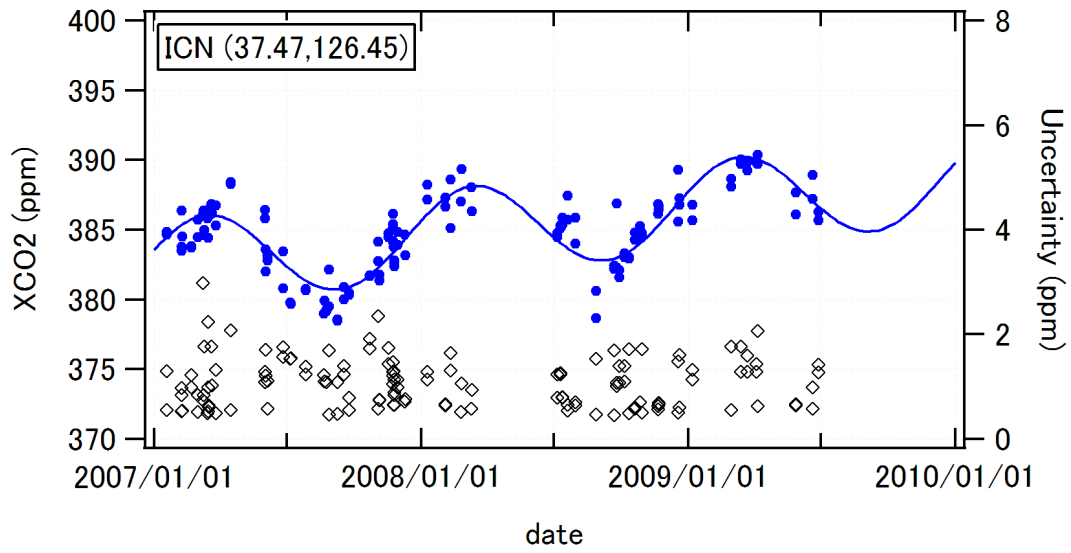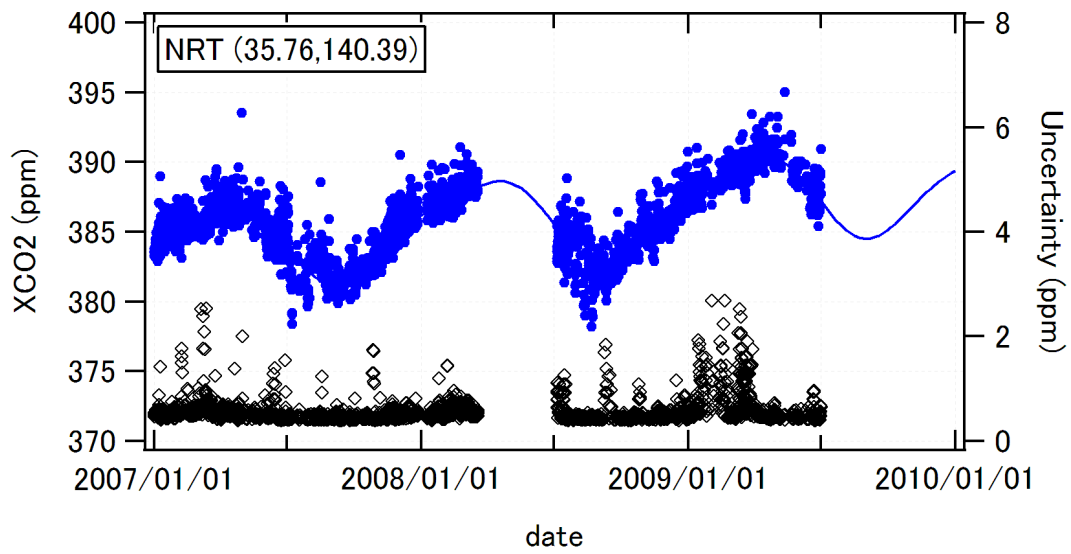

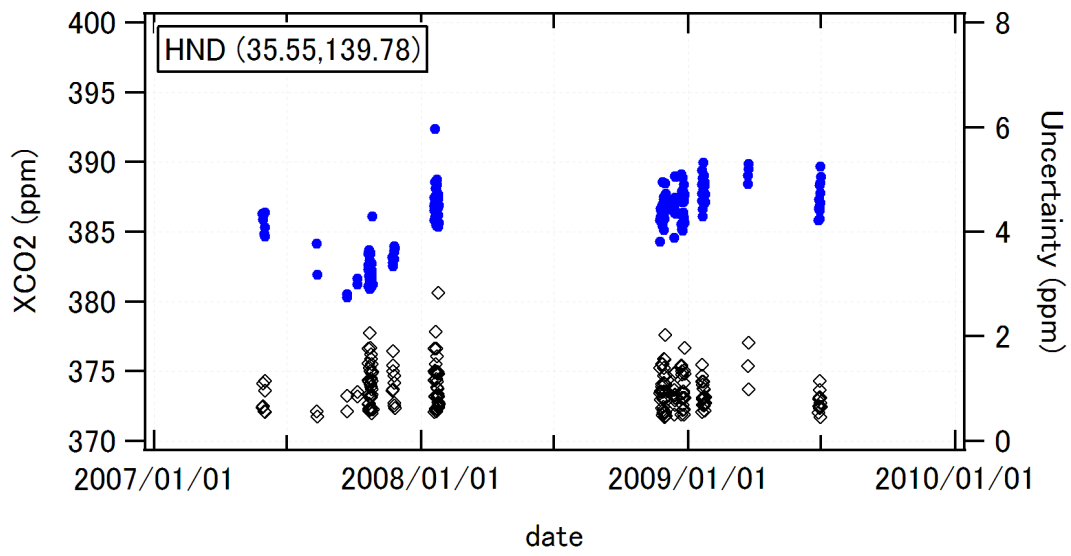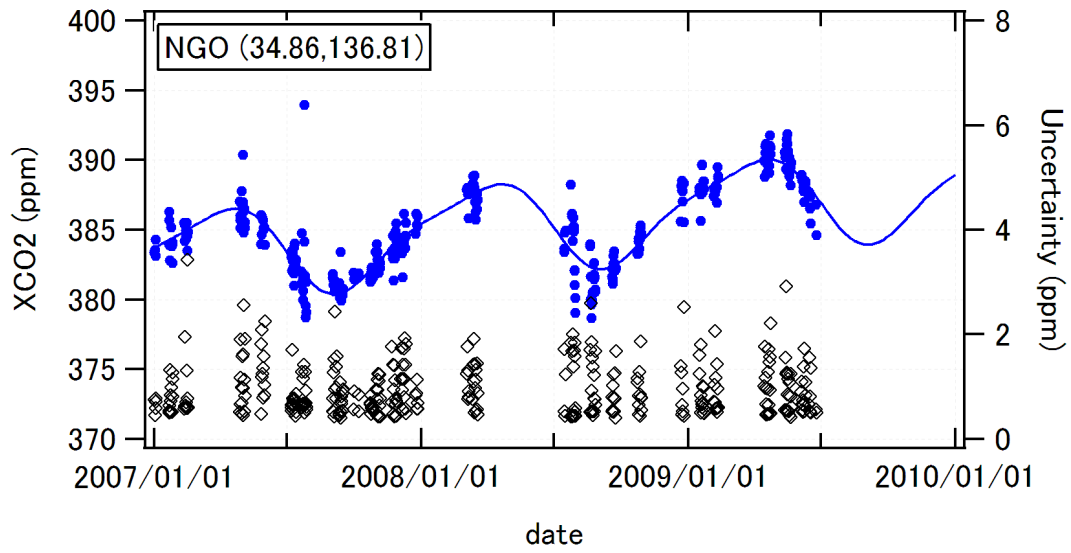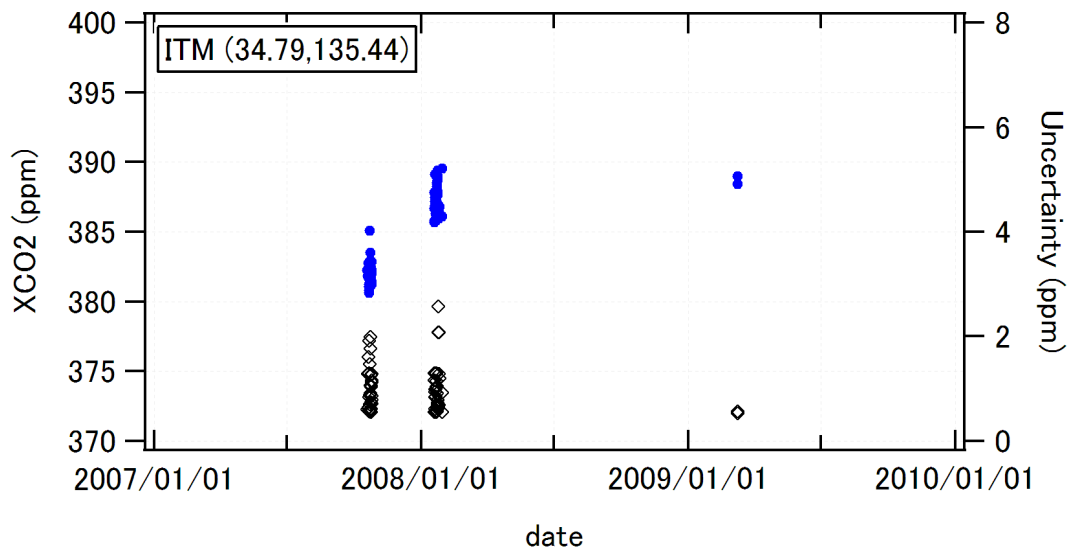

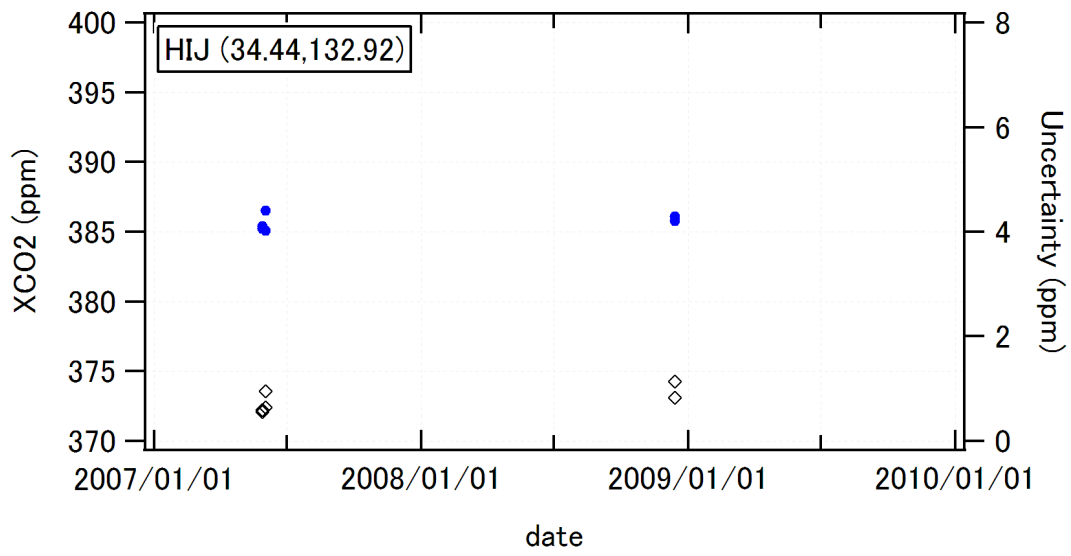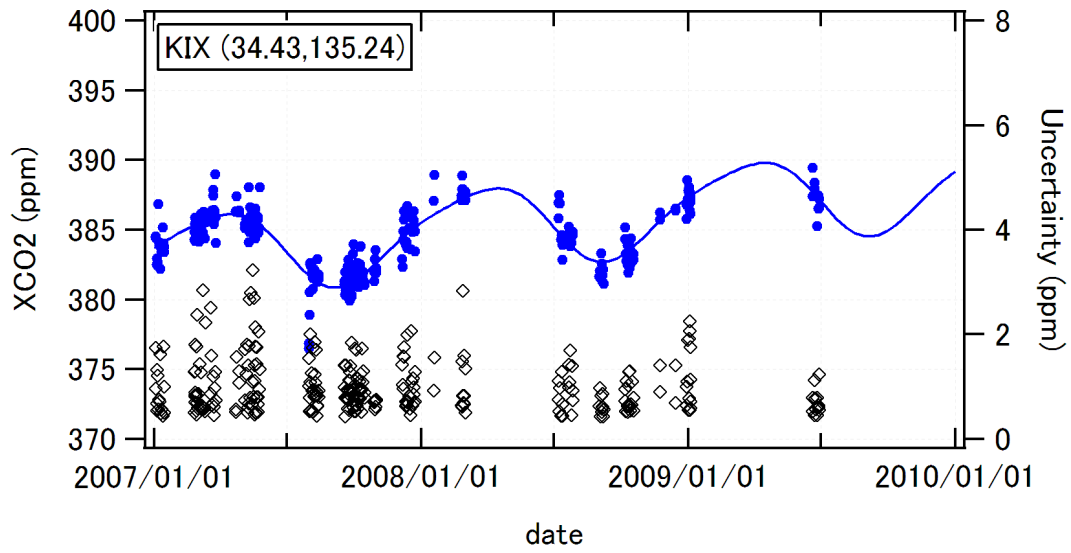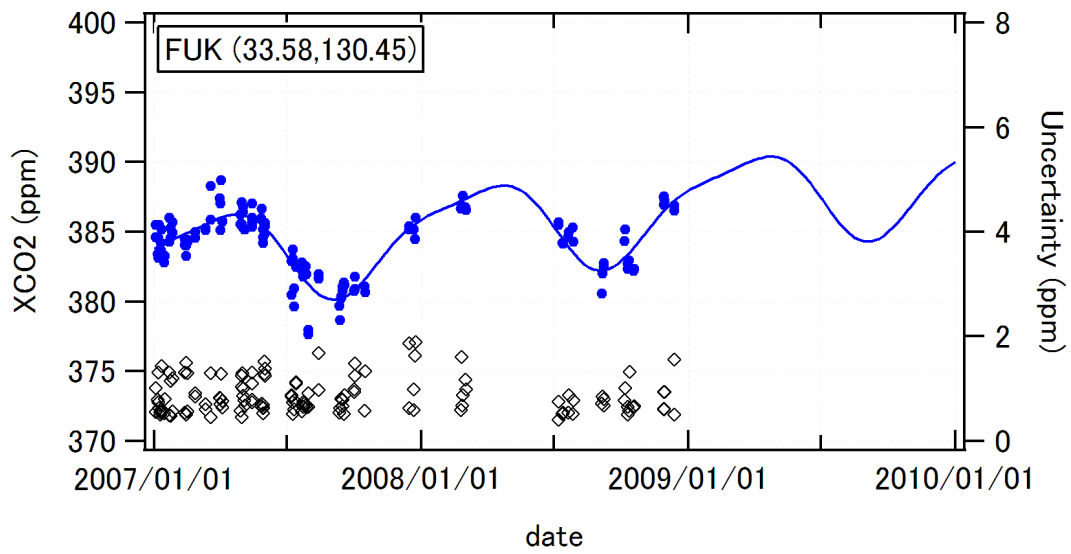

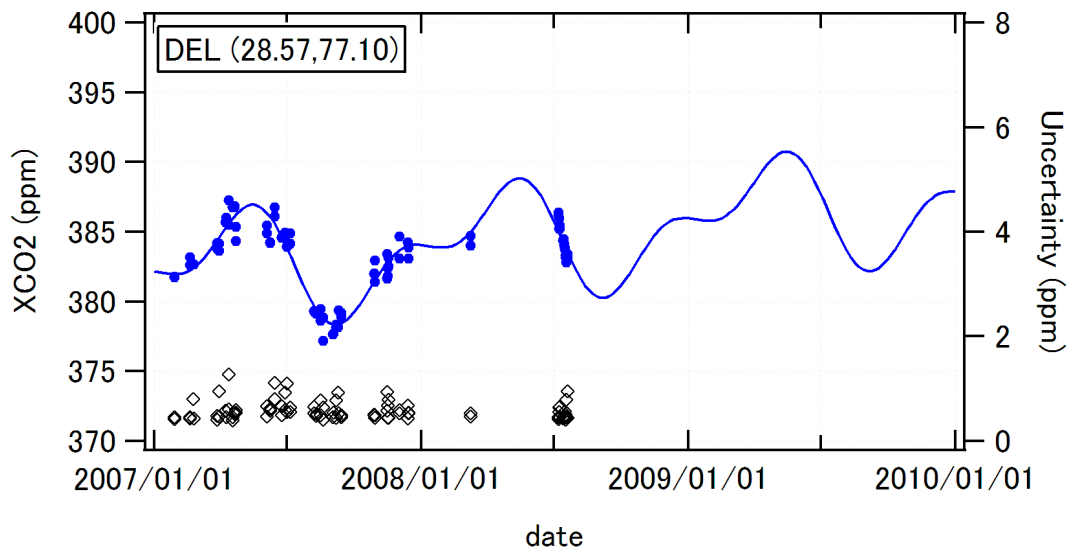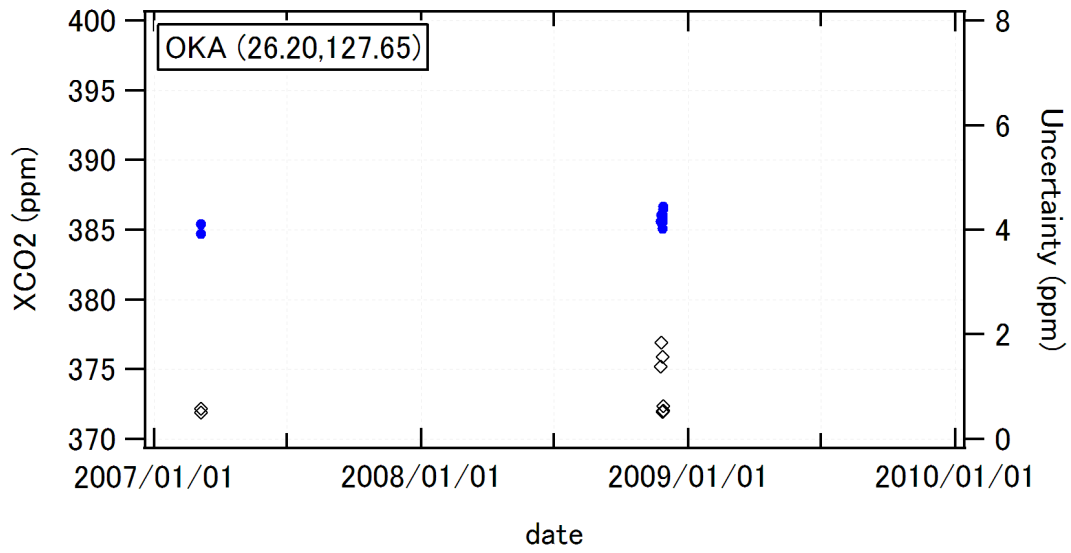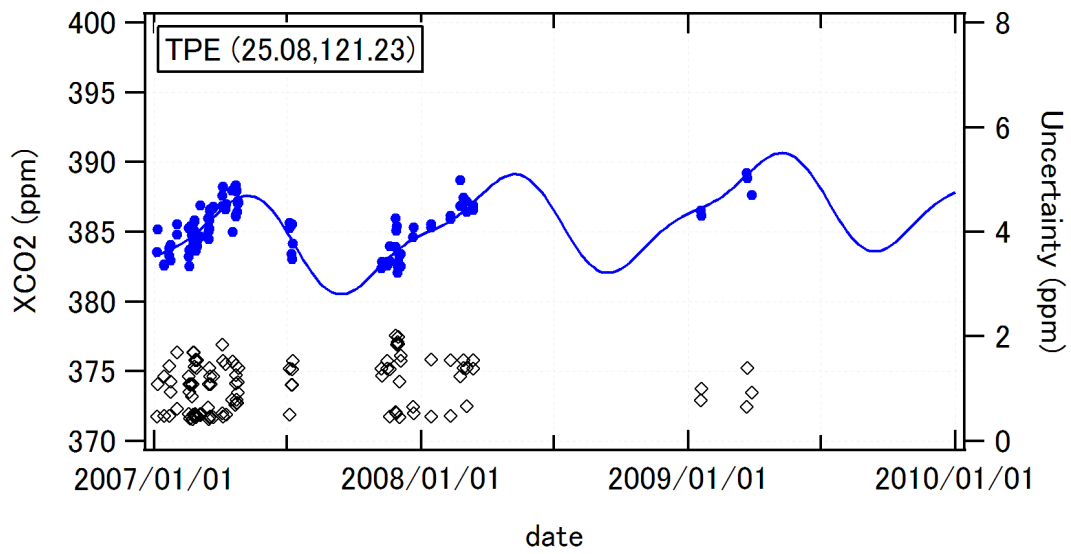

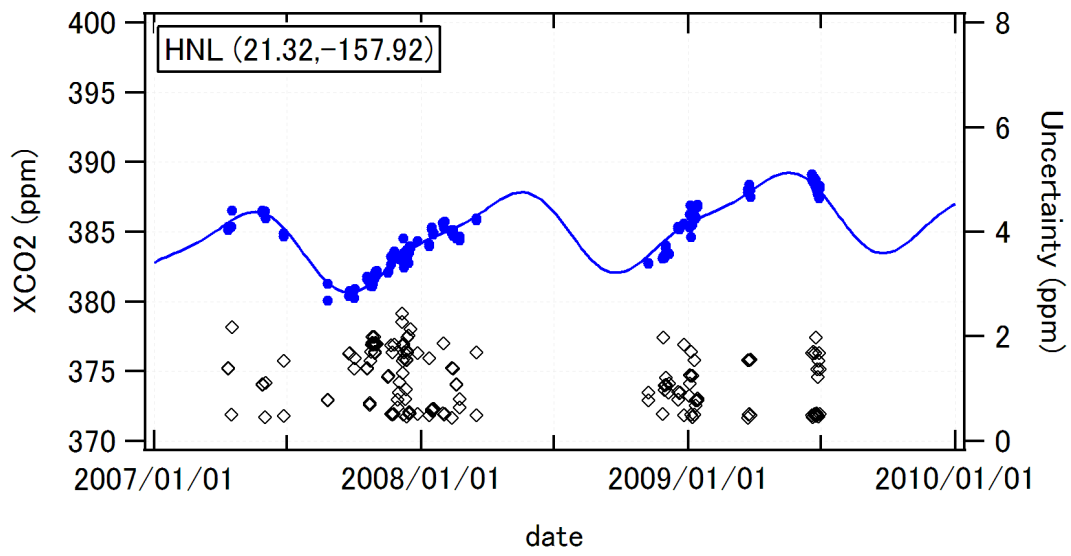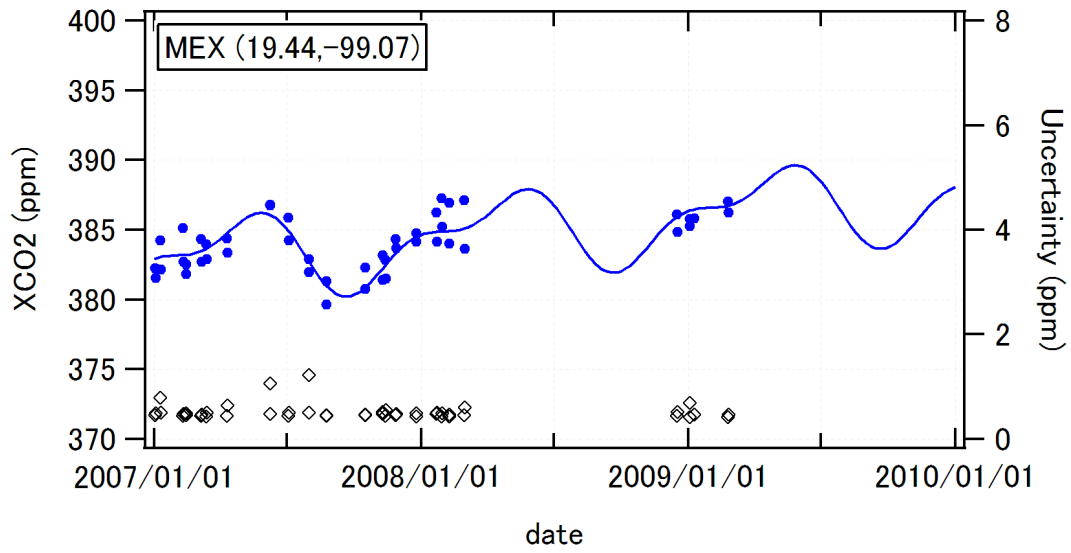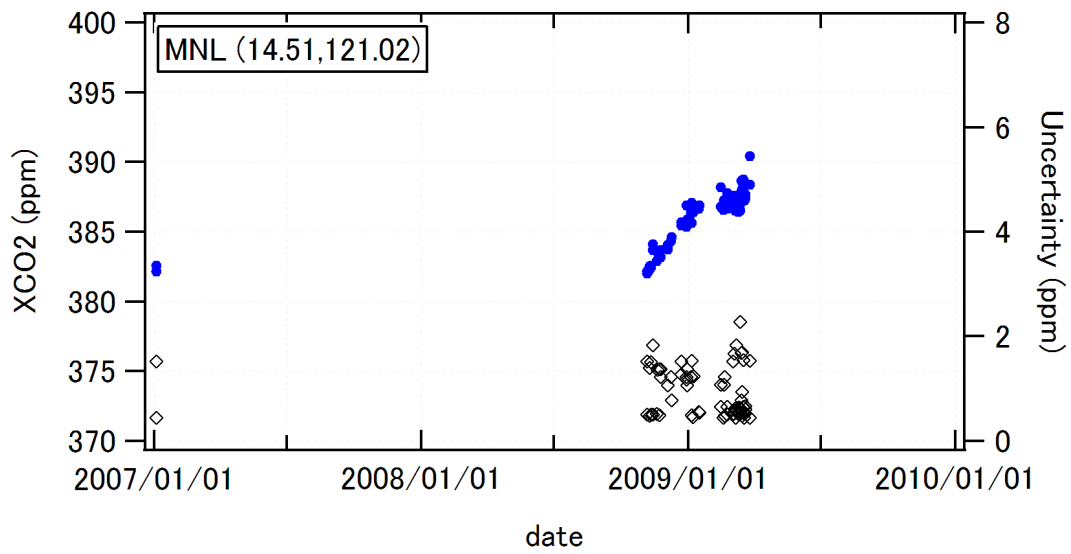



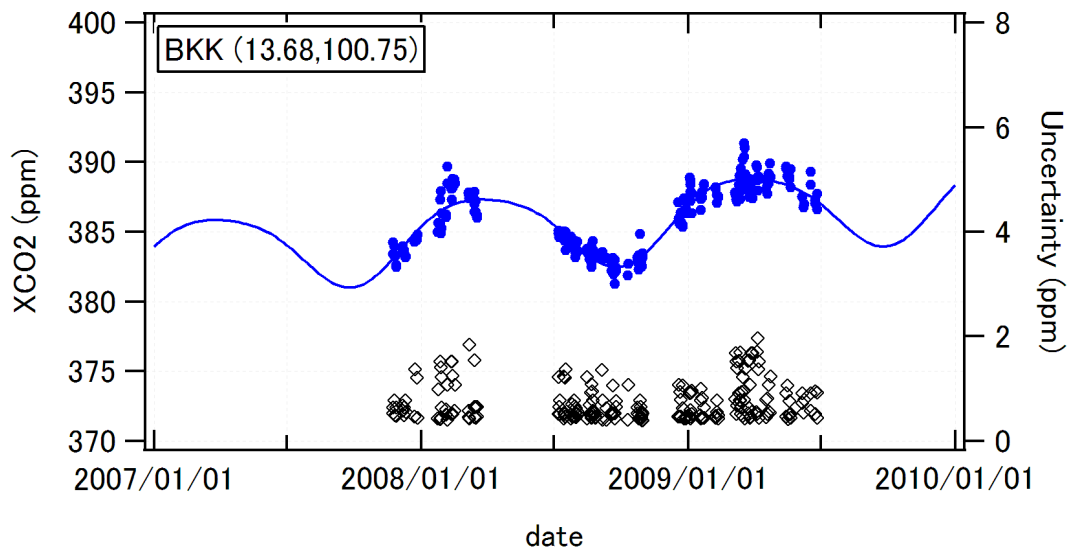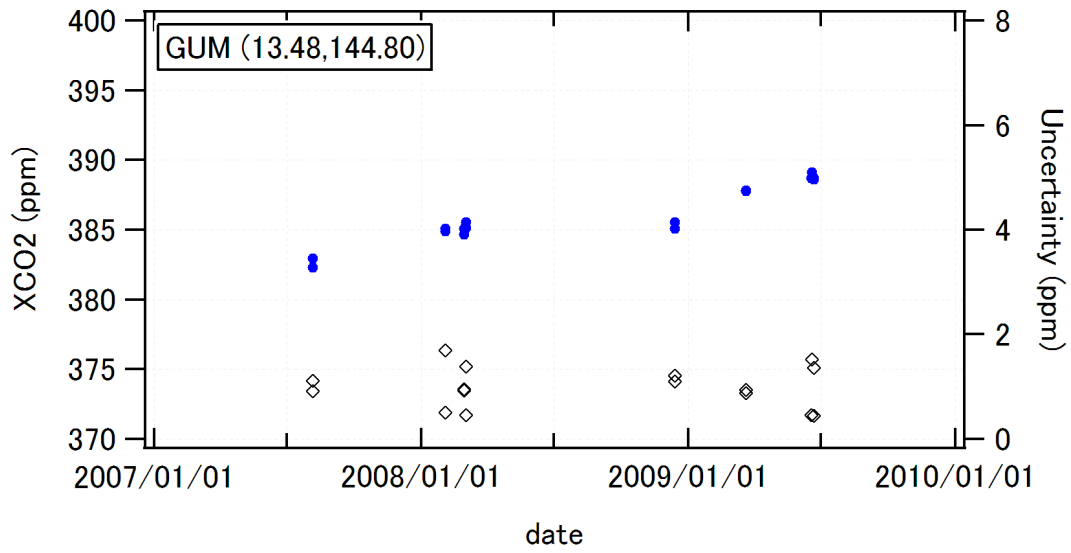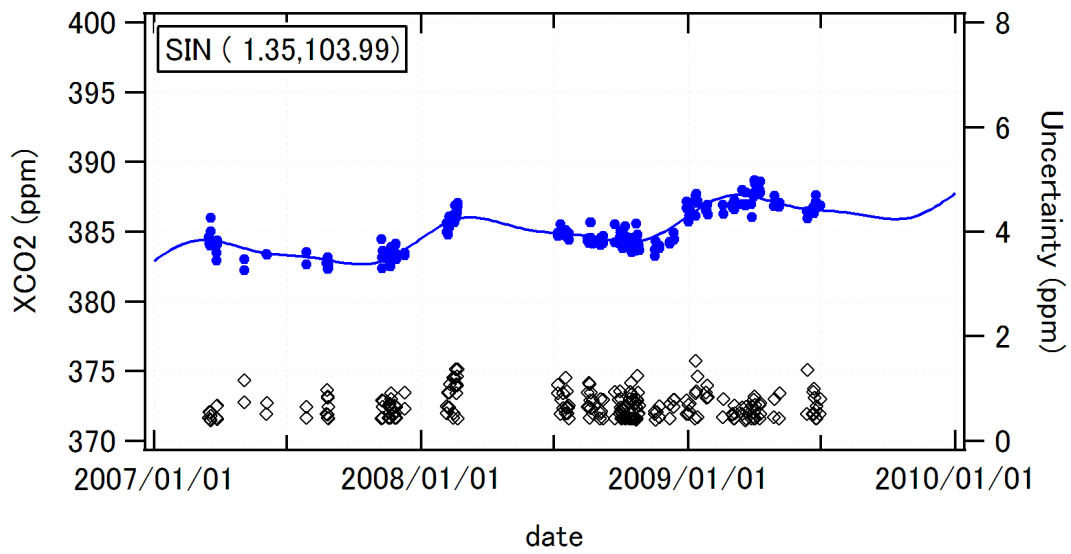

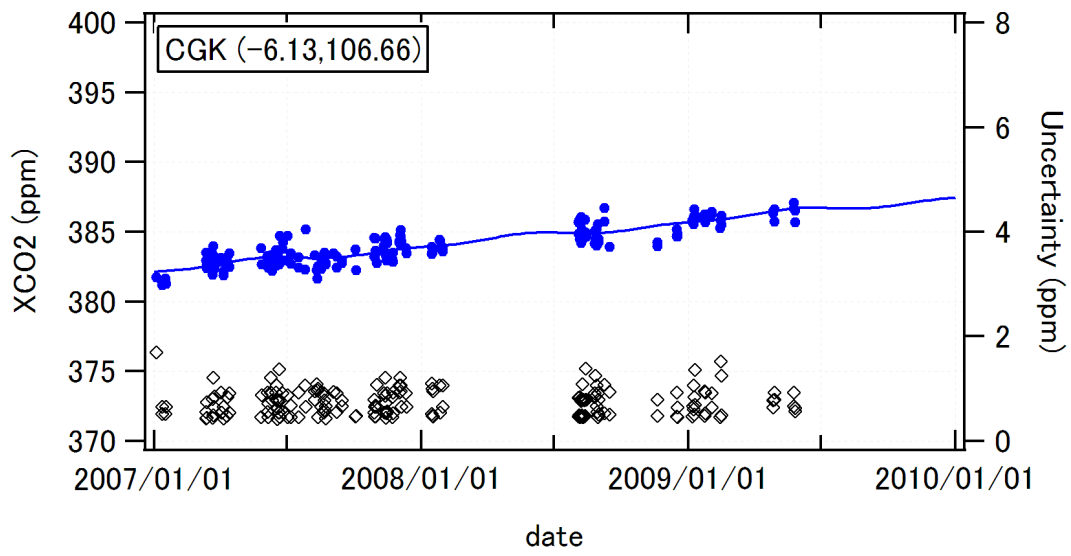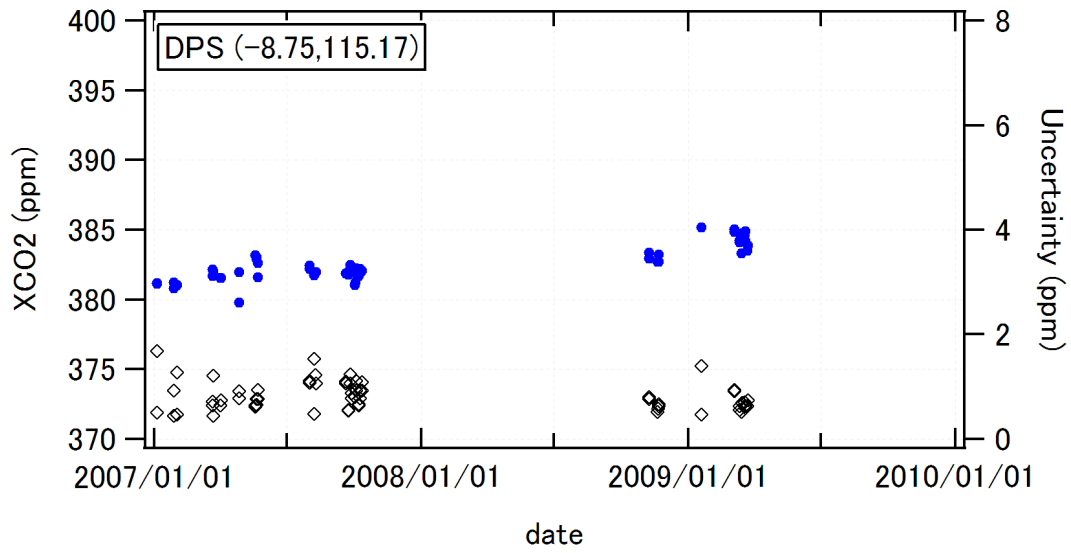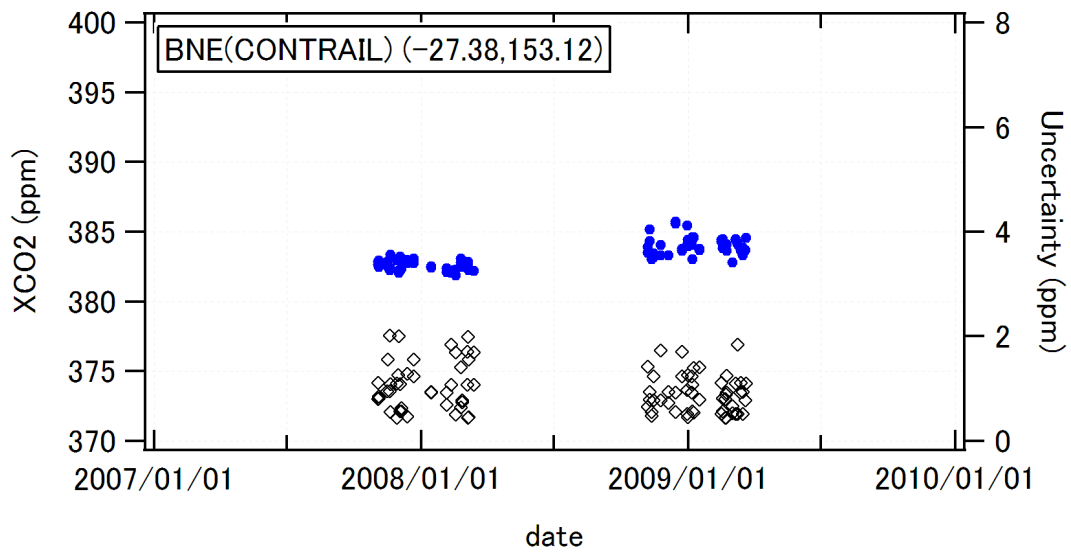

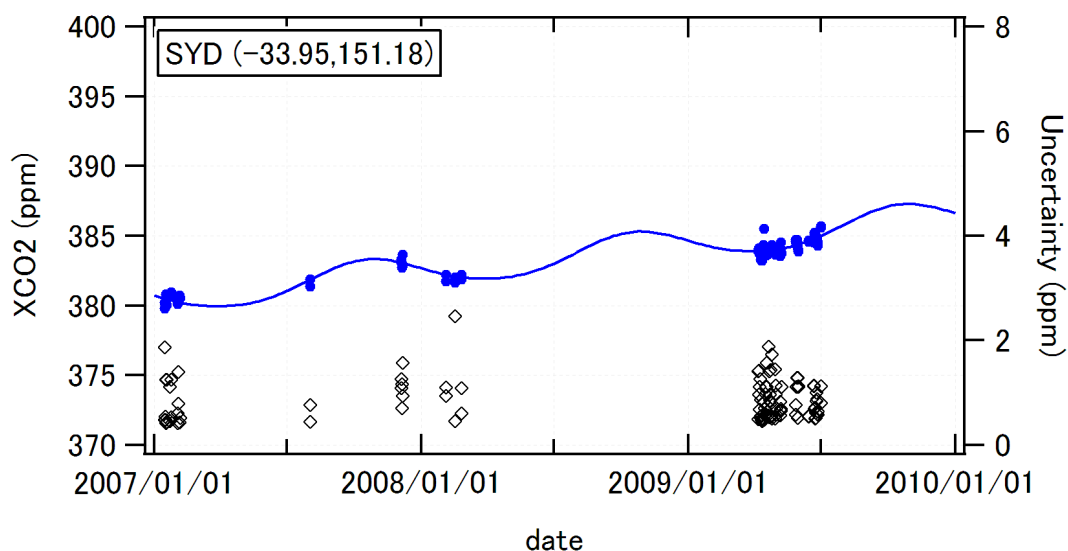

Figure S1. Calculated XCO<sub>2</sub> values and their estimated uncertainties at the CONTRAIL sites. The site code (Table 1) and its latitude and longitude are shown at the upper left corner of each panel. Blue filled circles show XCO<sub>2</sub> (left axis), and black open rhomboids show their uncertainties (right axis). Blue solid lines show curves fitted to the temporal behavior of XCO<sub>2</sub> as a visual guide (only for sites where the number of data was sufficient).

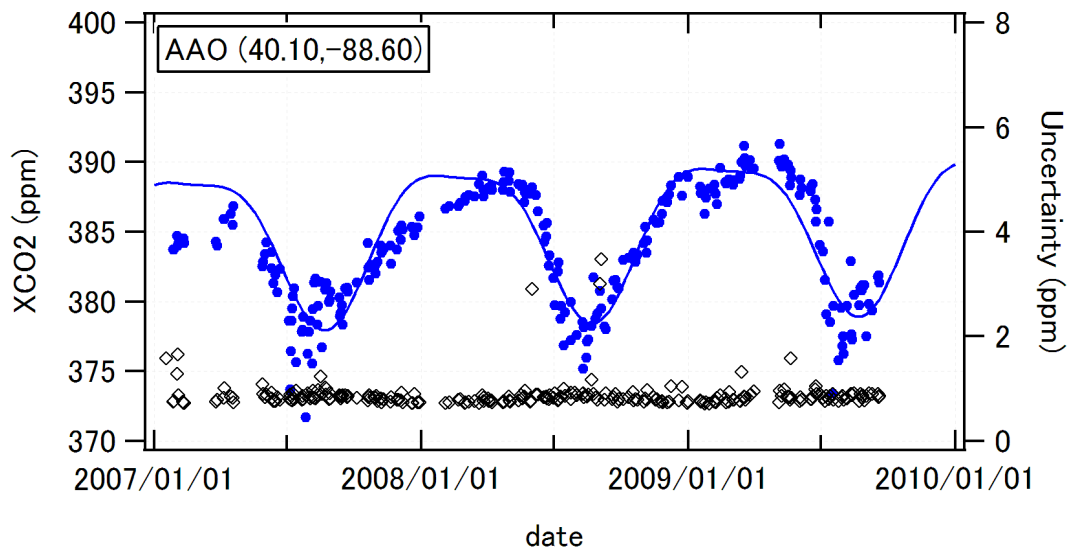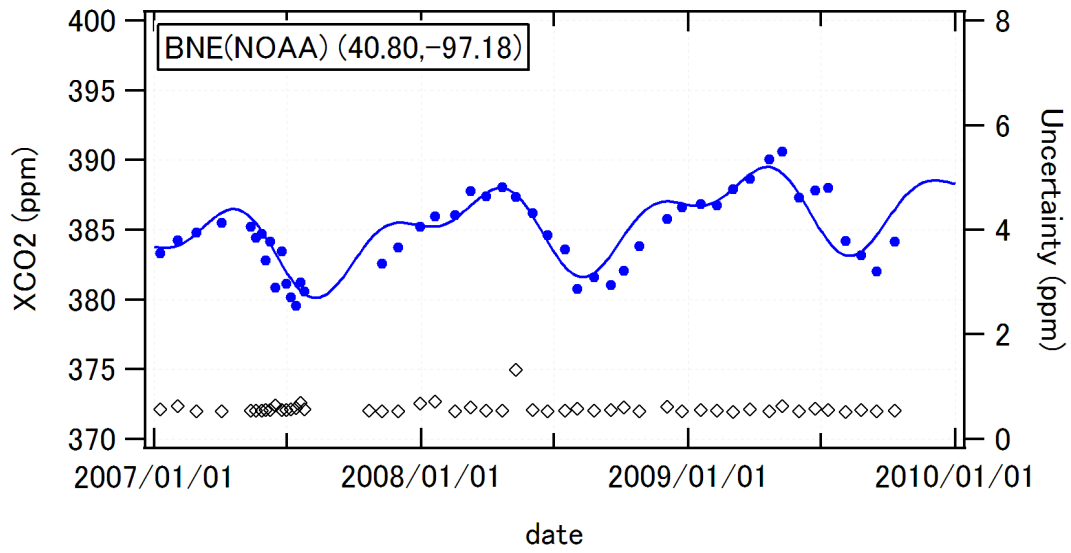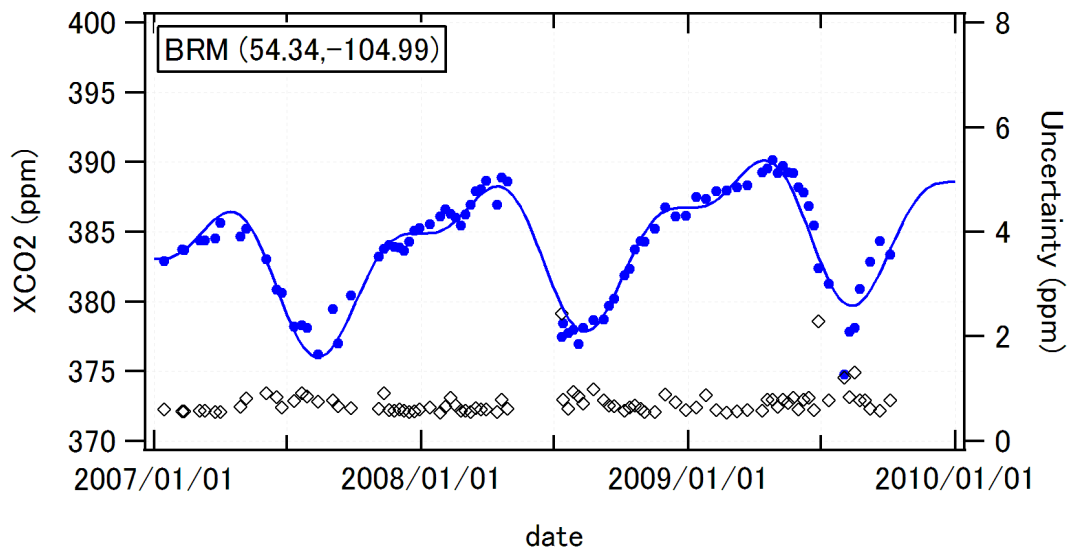

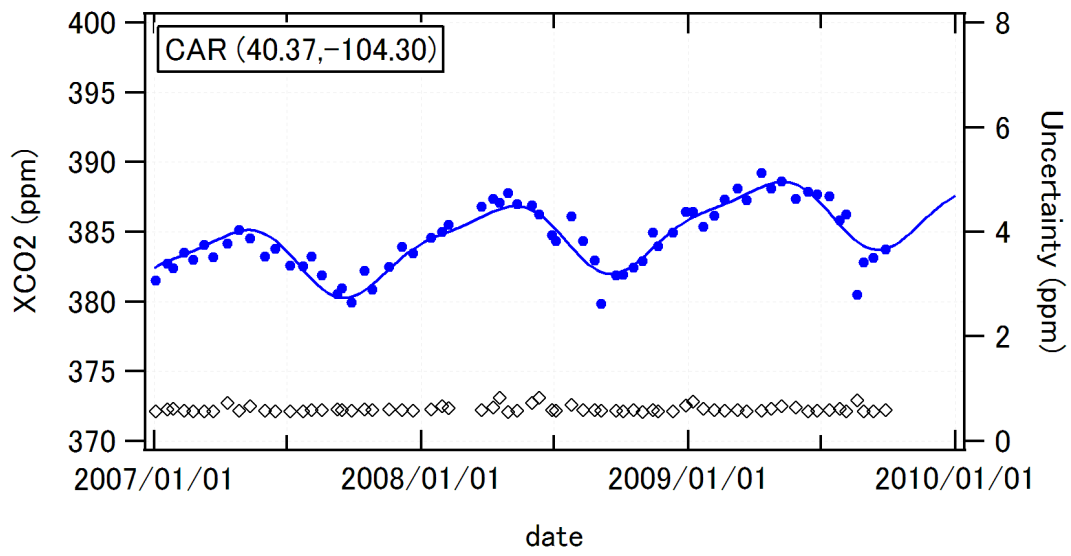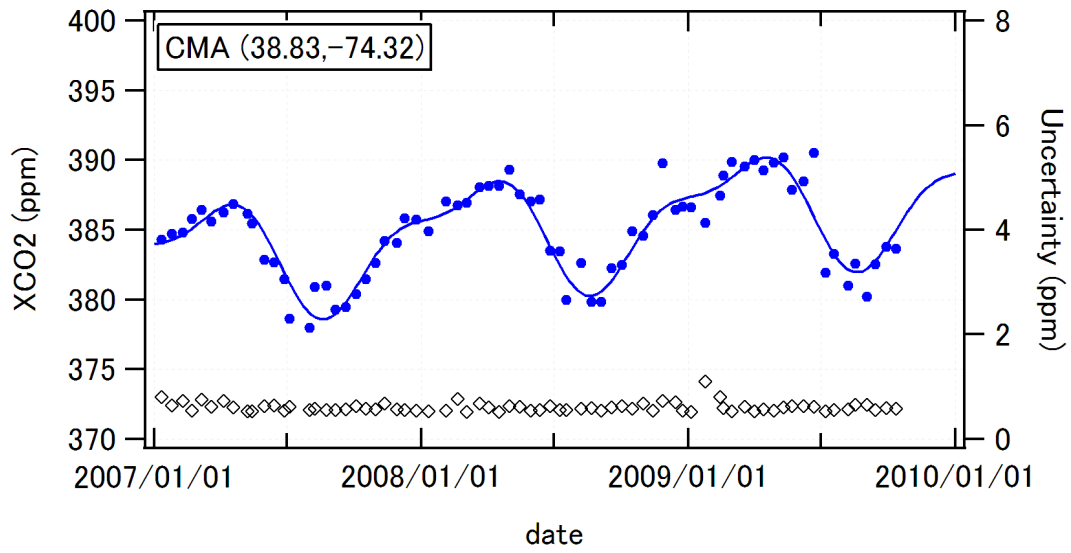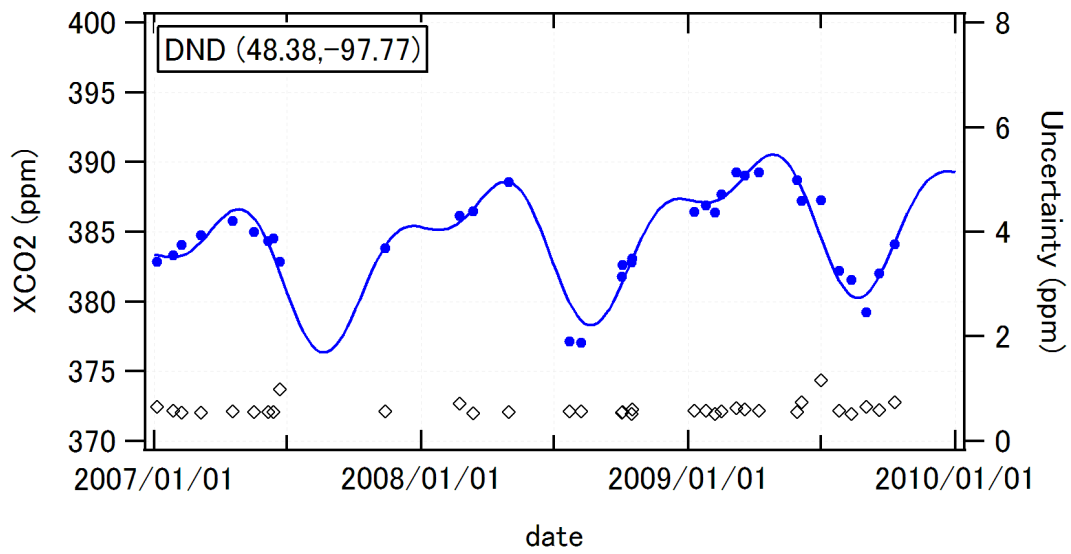

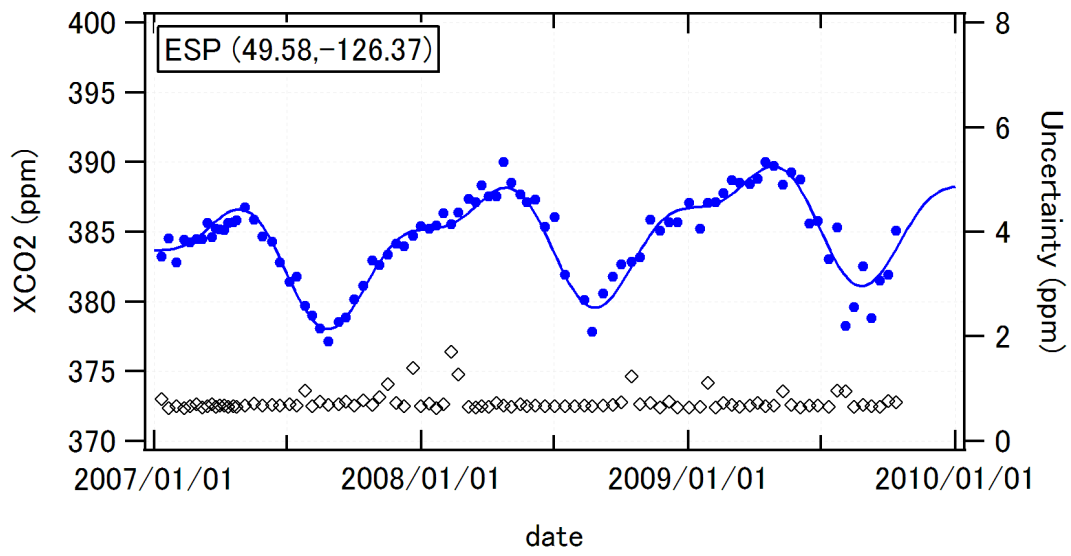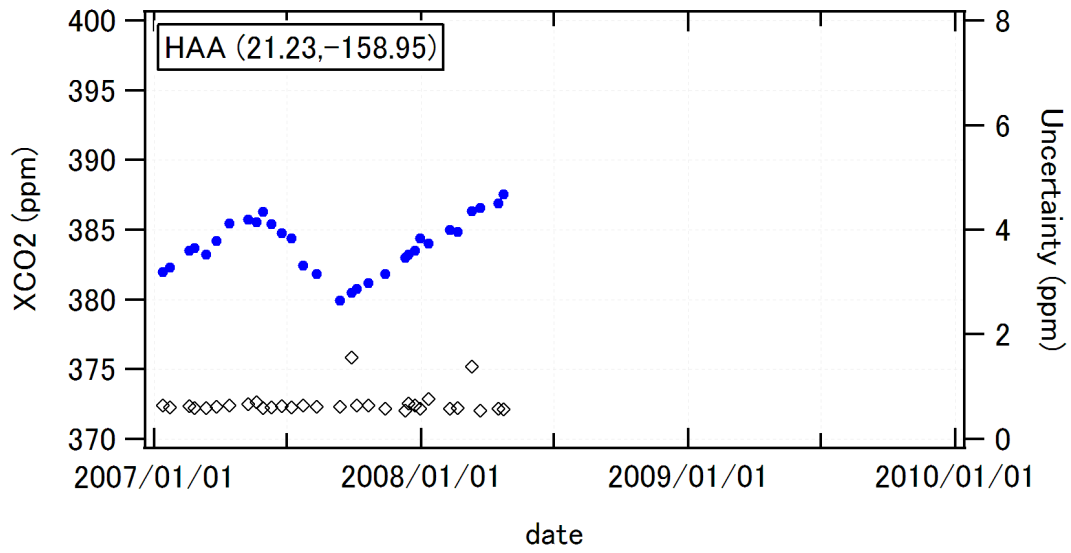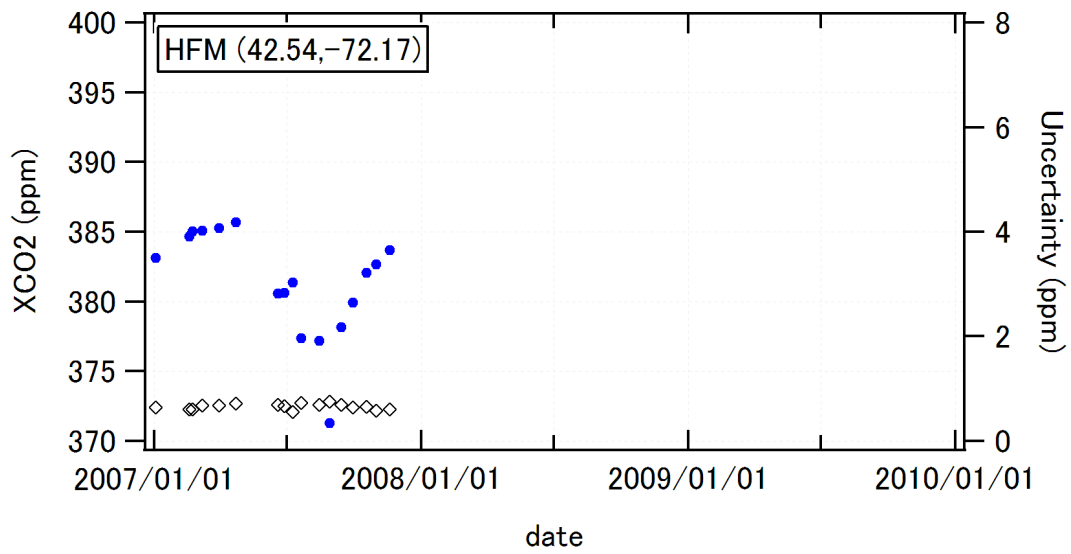

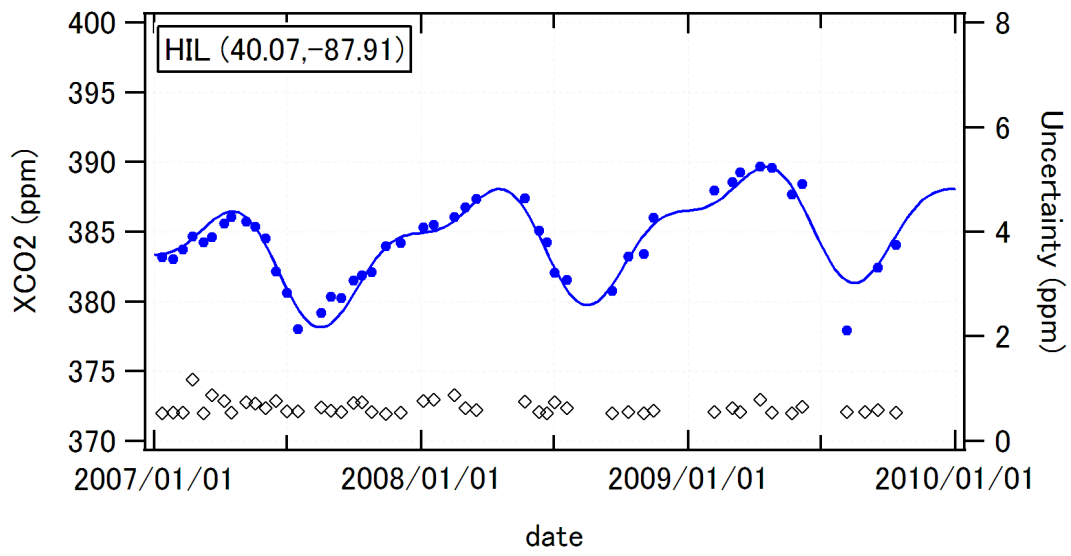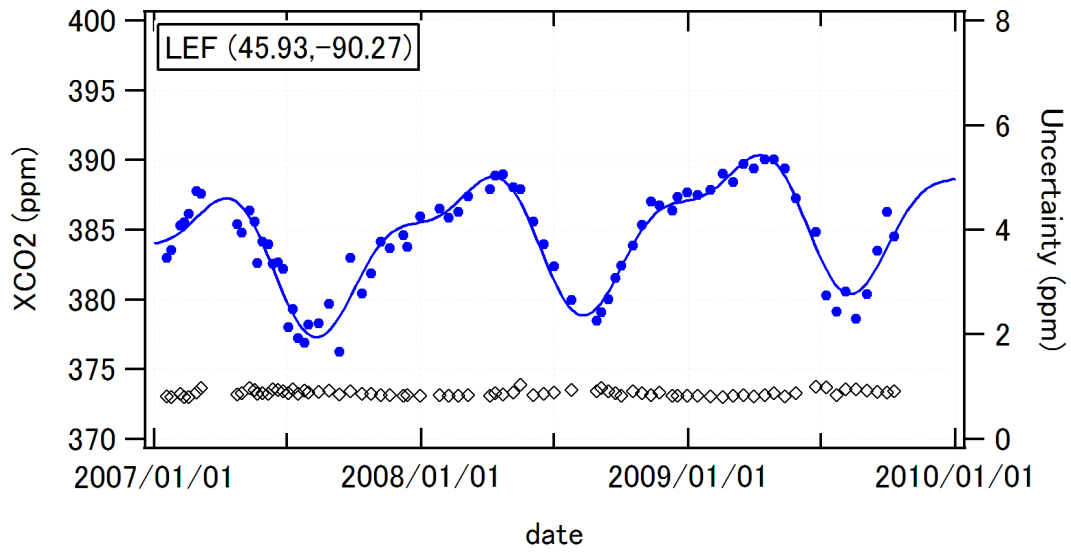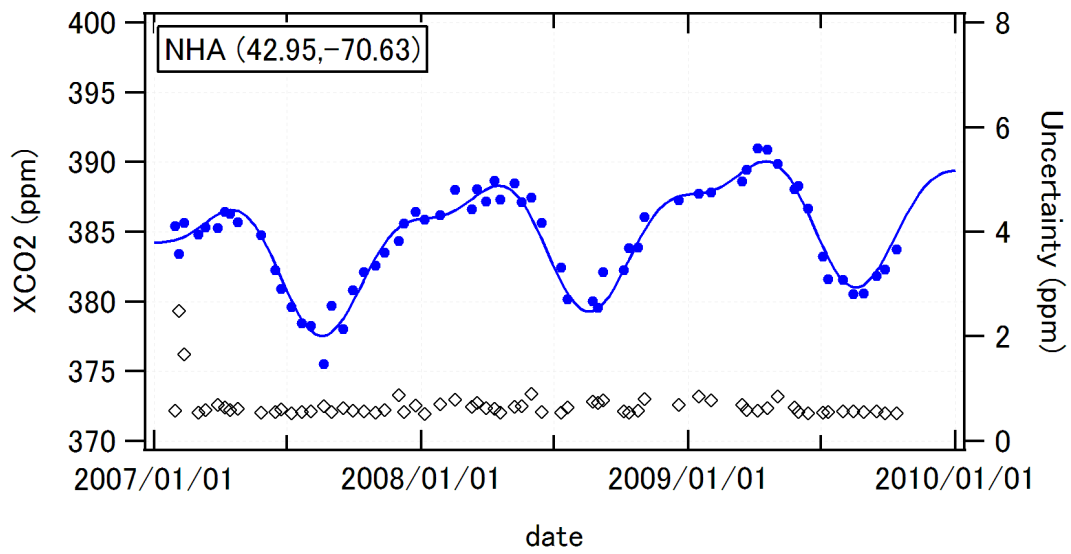

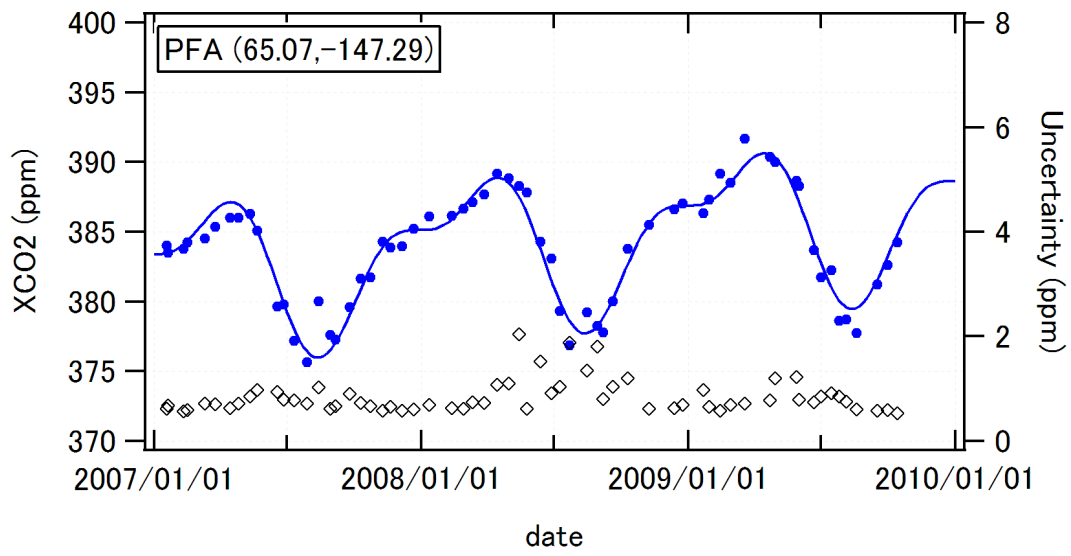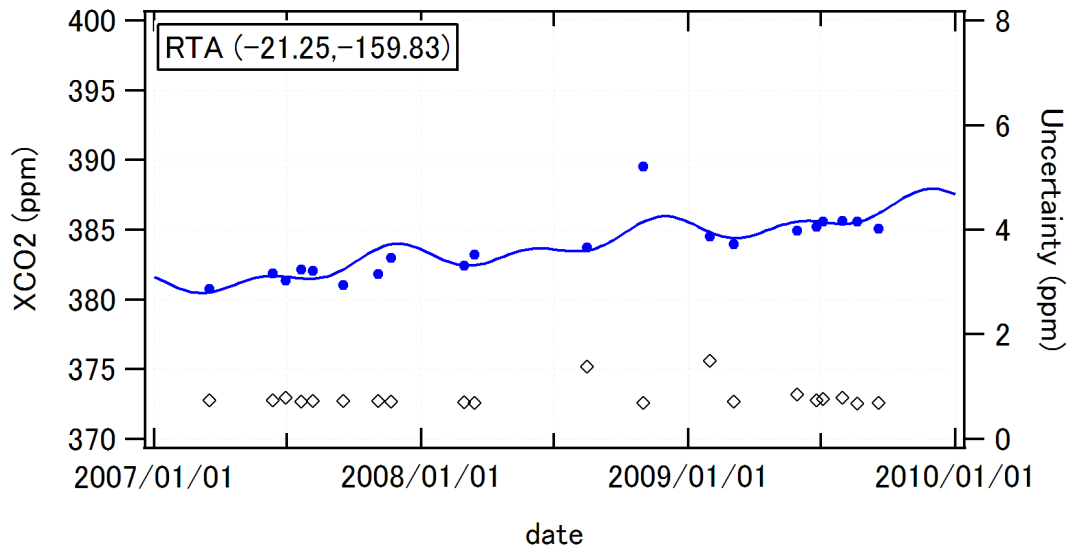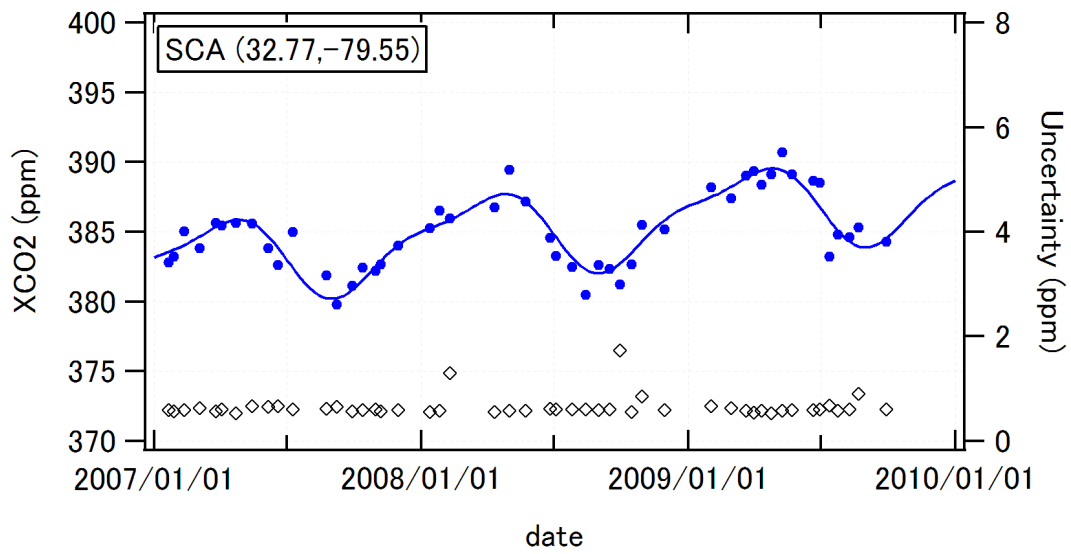



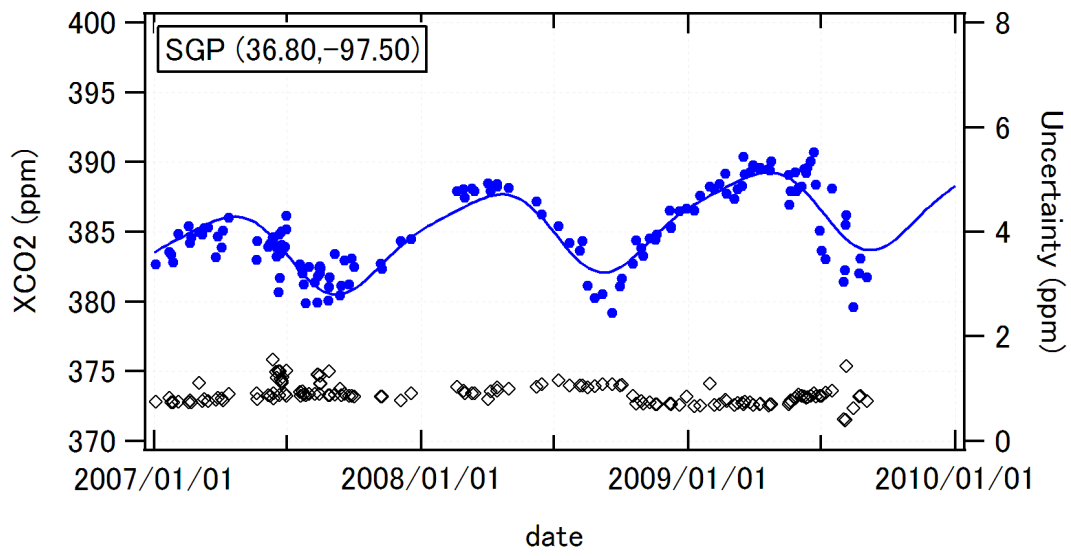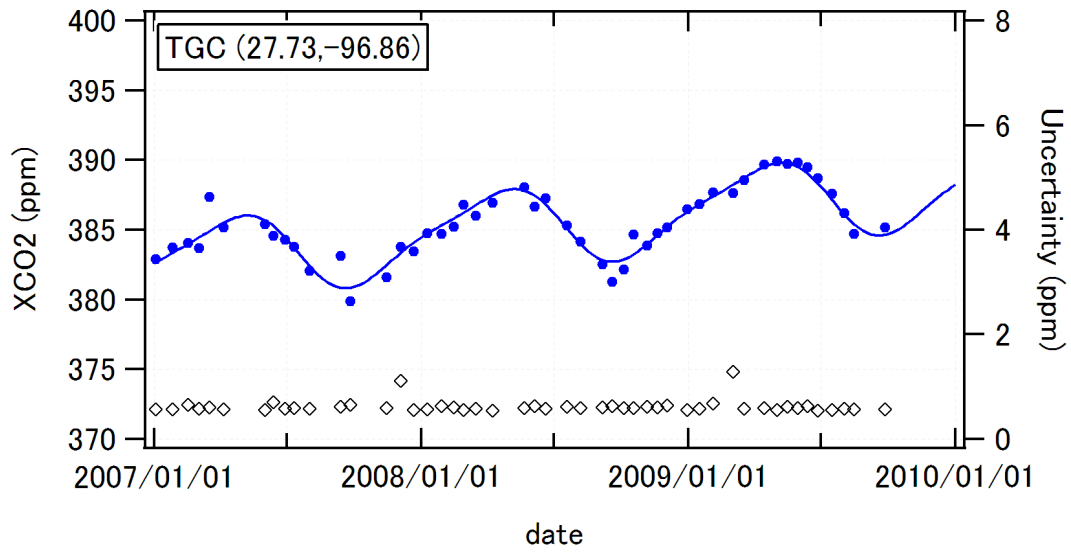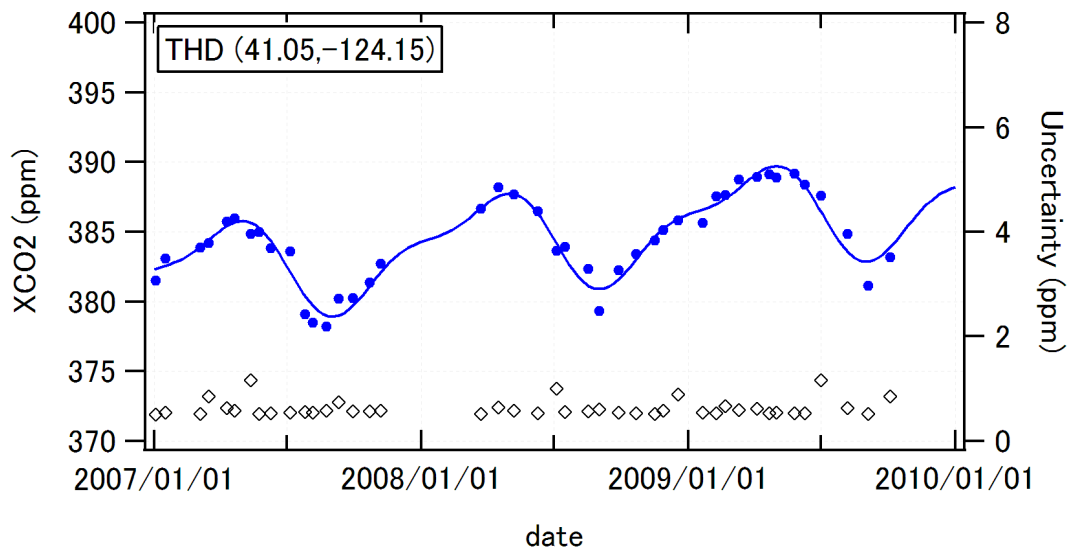

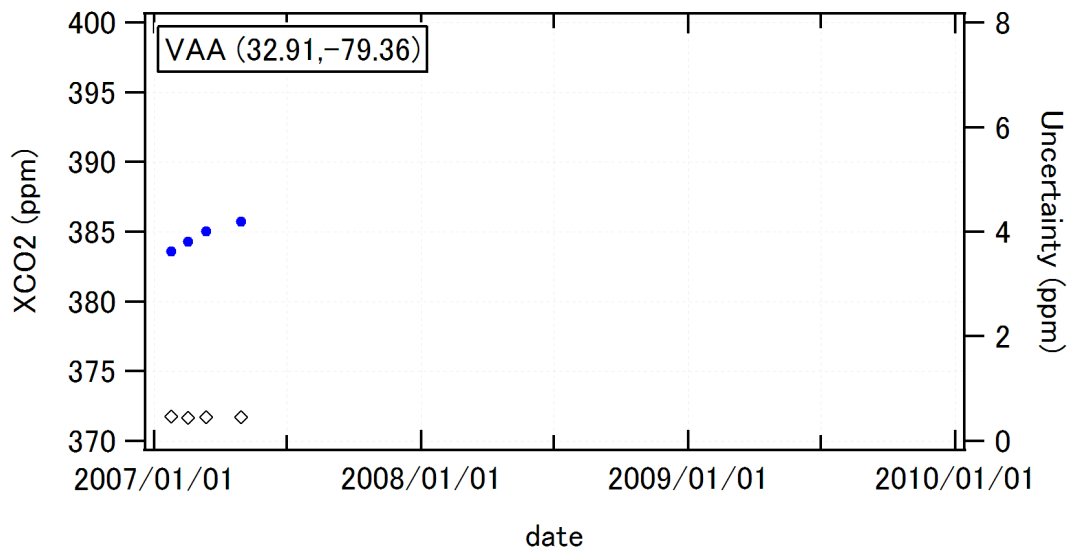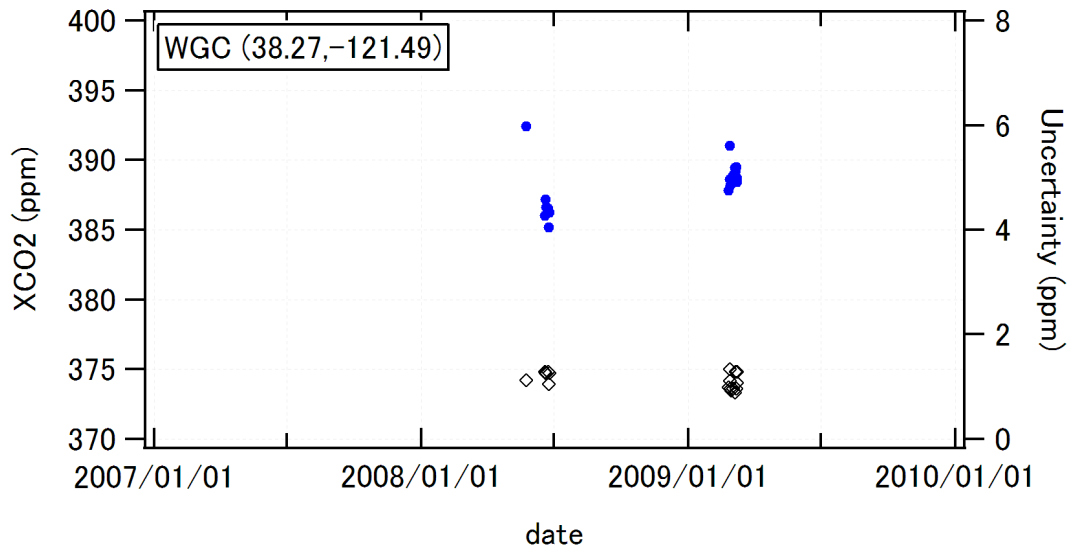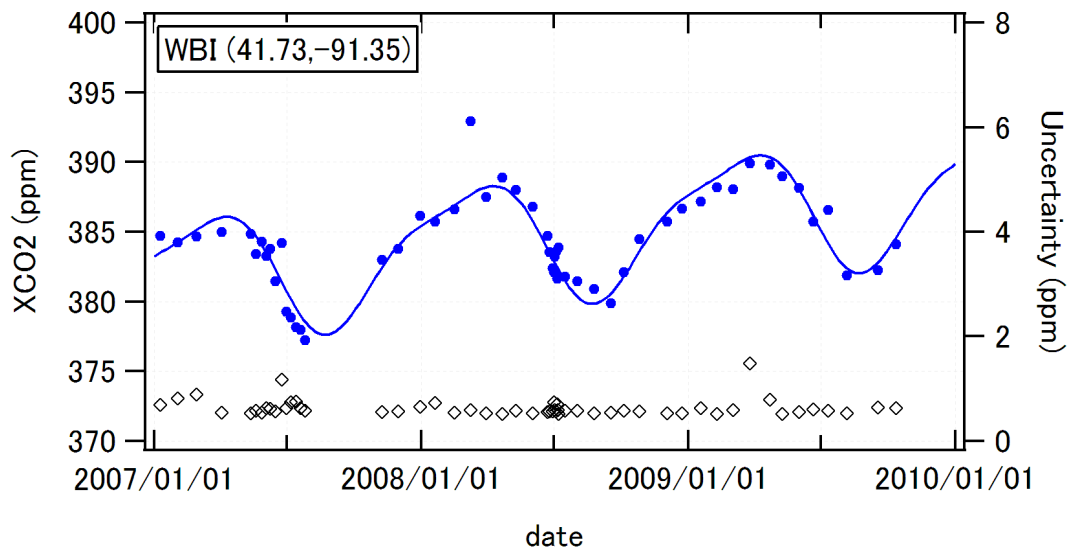

Figure S2. Same as Fig. S1 but showing the results at the NOAA sites.

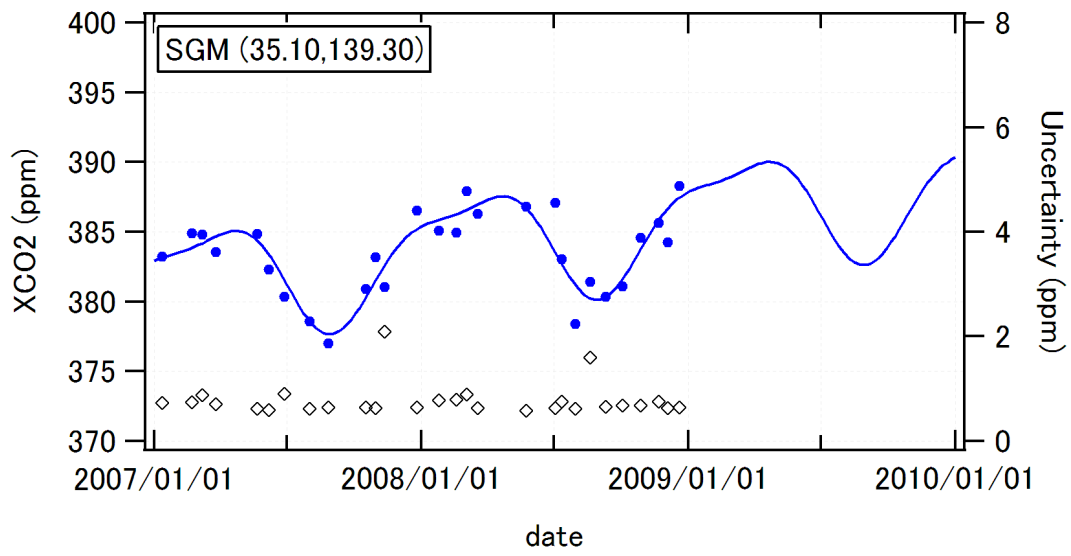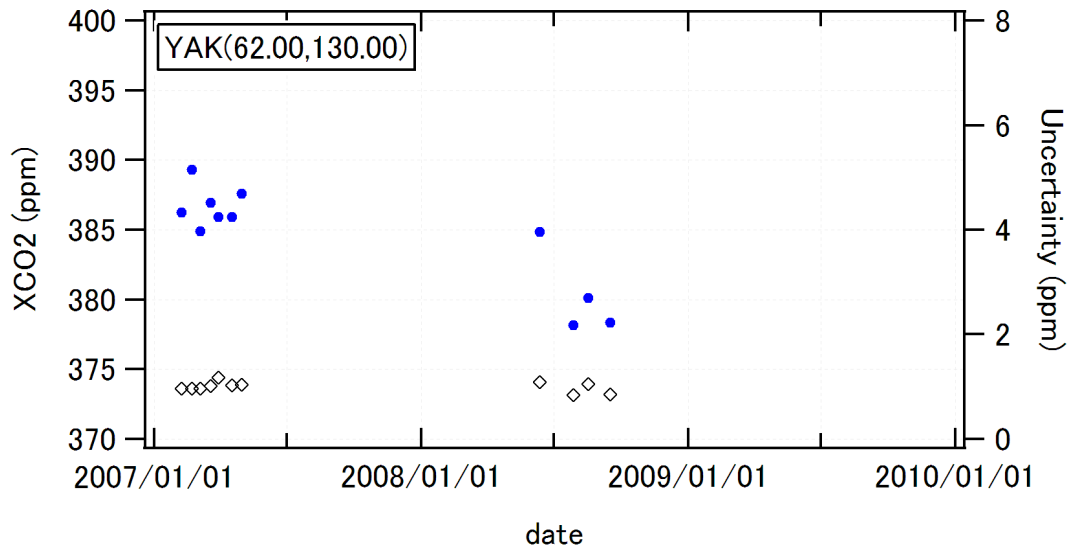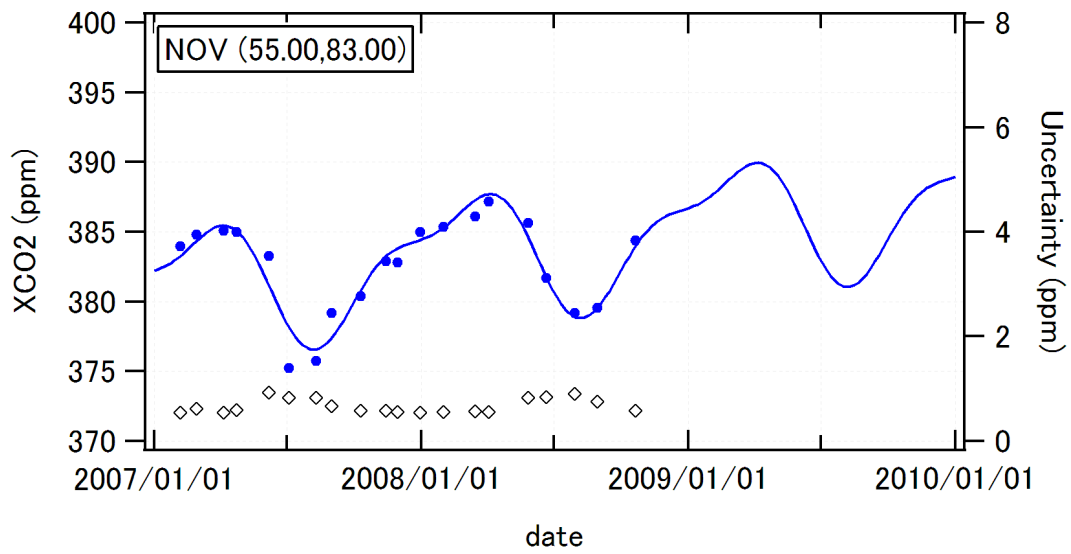

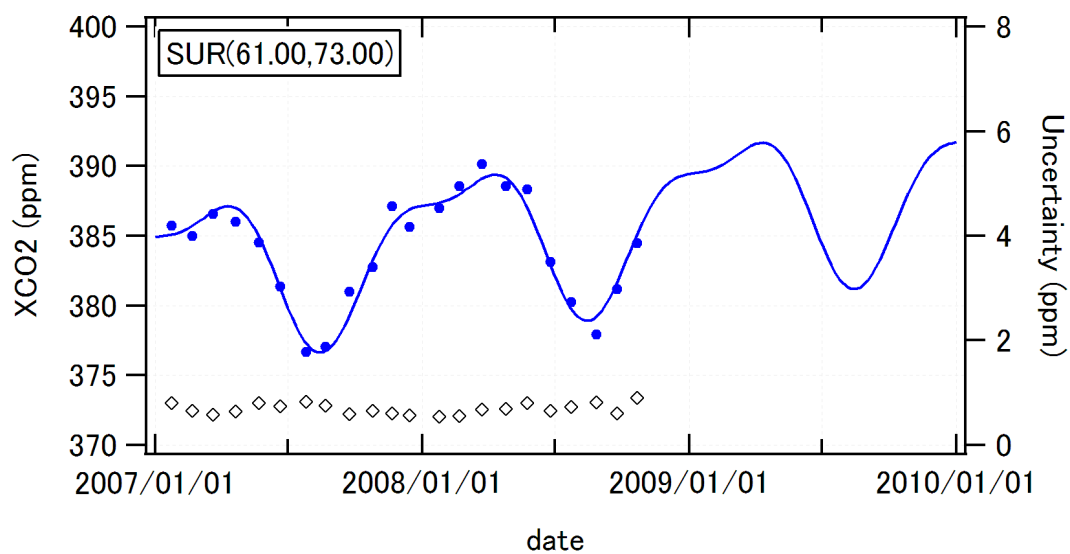

Figure S3. Same as Fig. S1 but showing the results at the NIES sites.
